# Supplementary material for: Synergistic effects of Ni and Cu supported on TiO2and SiO2on photocatalytic H2evolution with an electron donor–acceptor linked molecule
Source: Royal Society of Chemistry journal article supplement (doi:10.1039/c4cy01128g), 2014-10-02
Supplement: c4cy01128g1.pdf [file c4cy01128g1.pdf]

***Electronic Supplementary Information***

for

**Synergistic effects of Ni and Cu nanoparticles supported on  
TiO<sub>2</sub> and SiO<sub>2</sub> on photocatalytic H<sub>2</sub> evolution with an electron  
donor-acceptor linked molecule**

Yusuke Yamada,<sup>\*a</sup> Shinya Shikano,<sup>a</sup> Tomoki Akita<sup>b</sup> and Shunichi Fukuzumi<sup>\*,a</sup>

*<sup>a</sup>Department of Material and Life Science, Graduate School of  
Engineering, Osaka University, ALCA, Japan Science and Technology  
Agency (JST), Suita, Osaka 565-0871, Japan*

*<sup>b</sup>National Institute of Advanced Industrial Science and Technology (AIST), Ikeda,  
Osaka 563-8577, Japan*

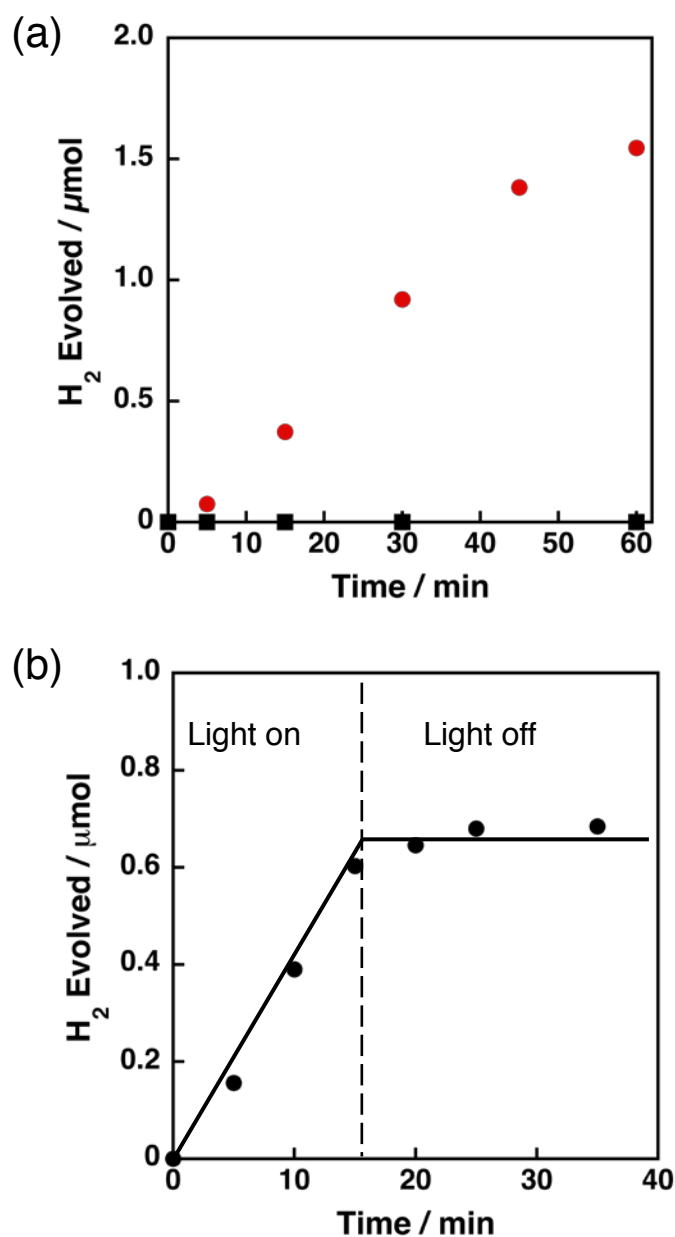

**Fig. S1** (a) Time courses of H<sub>2</sub> evolution by photoirradiation ( $\lambda > 340$  nm) of a mixed suspension (2.0 mL) of a phthalate buffer (pH 4.5) and MeCN [1:1 (v/v)] containing NADH ( $1.0 \times 10^{-3}$  M) and 3 wt% Ni-Cu/TiO<sub>2</sub> ( $100 \text{ mg L}^{-1}$ ) in the presence (red circle) and absence (black square) of QuPh<sup>+</sup>-NA ( $8.8 \times 10^{-4}$  M). (b) Time courses of H<sub>2</sub> evolution by photoirradiation ( $\lambda > 340$  nm) of a mixed suspension (2.0 mL) of a phthalate buffer (pH 4.5) and MeCN [1:1 (v/v)] containing QuPh<sup>+</sup>-NA ( $8.8 \times 10^{-4}$  M), NADH ( $1.0 \times 10^{-3}$  M) and 3 wt% Ni-Cu/TiO<sub>2</sub> ( $100 \text{ mg L}^{-1}$ ) for 15 min. No H<sub>2</sub> evolution was observed in the dark (after 15 min).

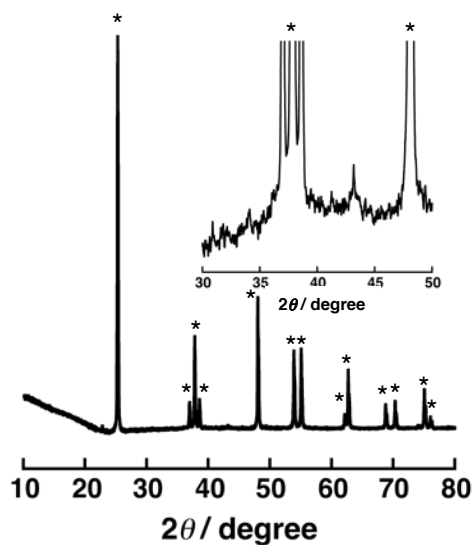

**Fig. S2** Powder X-ray diffraction patterns of 3 wt% Ni-Cu/TiO<sub>2</sub> [Ni/Cu = 1:1 (w/w)] after the photocatalytic H<sub>2</sub> evolution. The peaks with \* originate from TiO<sub>2</sub> (anatase).

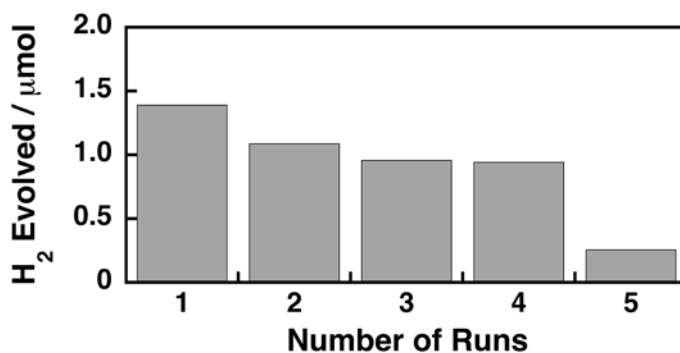

**Fig. S3** Volume of evolved H<sub>2</sub> in the repetitive experiments at each run. H<sub>2</sub> evolution was carried out by photoirradiation ( $\lambda > 340$  nm) of a mixed suspension (2.0 mL) of a phthalate buffer (pH 4.5) and MeCN [1:1 (v/v)] containing QuPh<sup>+</sup>-NA ( $1.1 \times 10^{-4}$  M), 3 wt% Ni-Cu/TiO<sub>2</sub> ( $100 \text{ mg L}^{-1}$ ) and NADH ( $1.0 \times 10^{-3}$  M). A small portion of an aqueous solution of concentrated NADH was added to the reaction after ceasing H<sub>2</sub> evolution. The concentration of NADH was  $1.0 \times 10^{-3}$  M in a starting solution at each run.

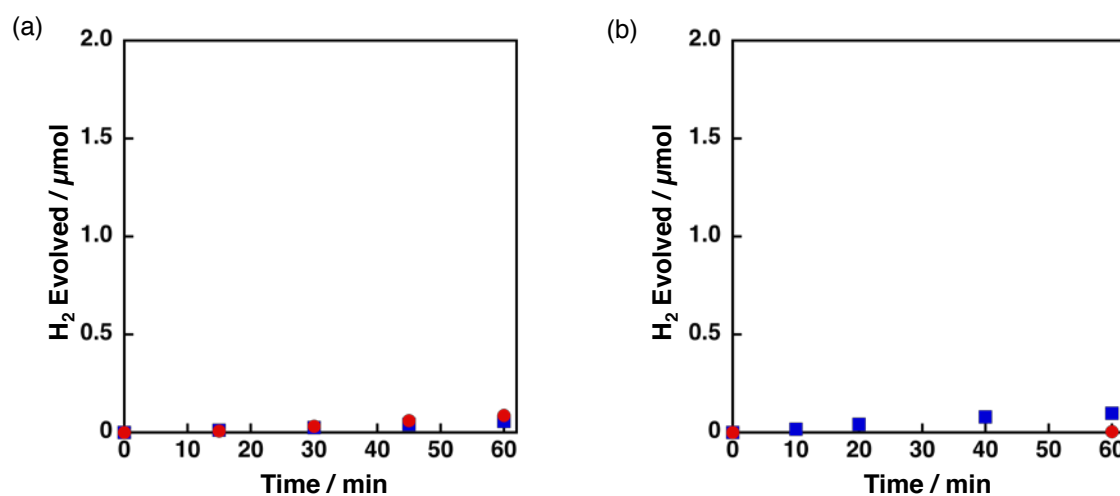

**Fig. S4** Time courses of H<sub>2</sub> evolution by photoirradiation ( $\lambda > 340$  nm) of a mixed suspension (2.0 mL) of a phthalate buffer (pH 4.5) and MeCN [1:1 (v/v)] containing QuPh<sup>+</sup>-NA ( $8.8 \times 10^{-4}$  M), NADH ( $1.0 \times 10^{-3}$  M) and (a) 3 wt% Ni/TiO<sub>2</sub> (red circle) and Cu/TiO<sub>2</sub> (blue square) and (b) 3 wt% Ni/SiO<sub>2</sub> (red circle) and Cu/SiO<sub>2</sub> (blue square) ( $100 \text{ mg L}^{-1}$ ).

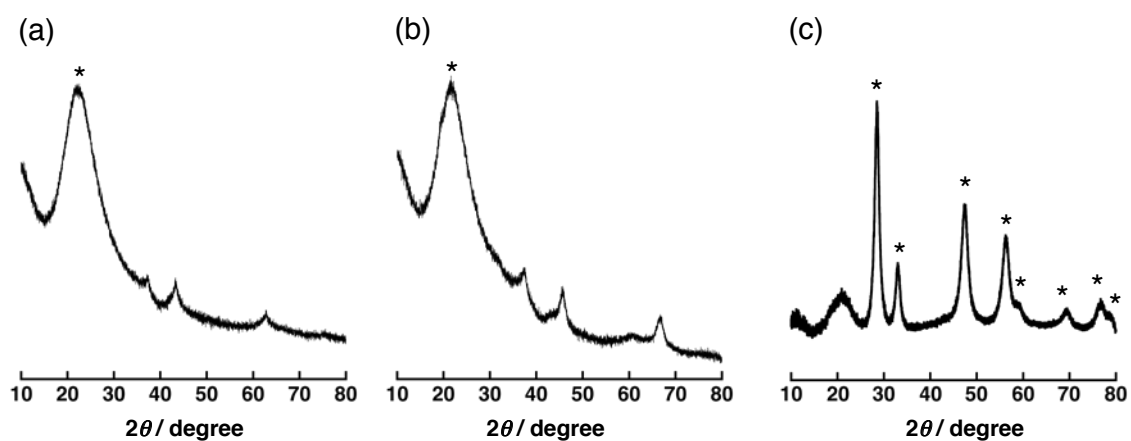

**Fig. S5** Powder X-ray diffraction patterns of 3 wt% Ni-Cu/MO<sub>x</sub>. [MO<sub>x</sub> = (a) SiO<sub>2</sub>, (b) SiO<sub>2</sub>-Al<sub>2</sub>O<sub>3</sub> and (c) CeO<sub>2</sub>]. The peaks with \* originate from MO<sub>x</sub>.

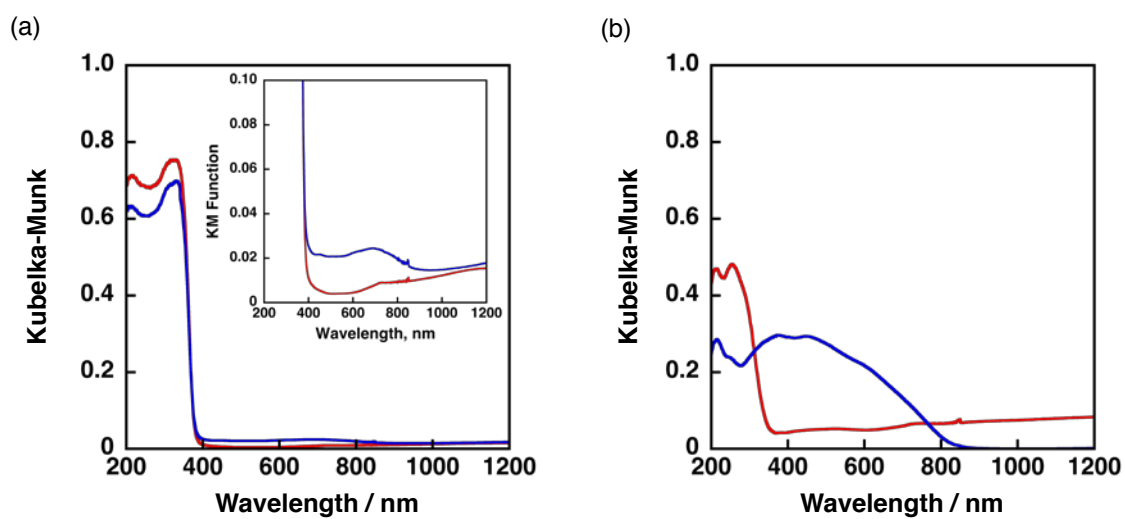

**Fig. S6** Diffuse reflectance UV-vis spectra of (a) 3 wt% Ni/TiO<sub>2</sub> (red) and 3 wt% Cu/TiO<sub>2</sub> (blue) and (b) 3 wt% Ni/SiO<sub>2</sub> (red) and 3 wt% Cu/SiO<sub>2</sub> (blue) prepared by co-impregnation.

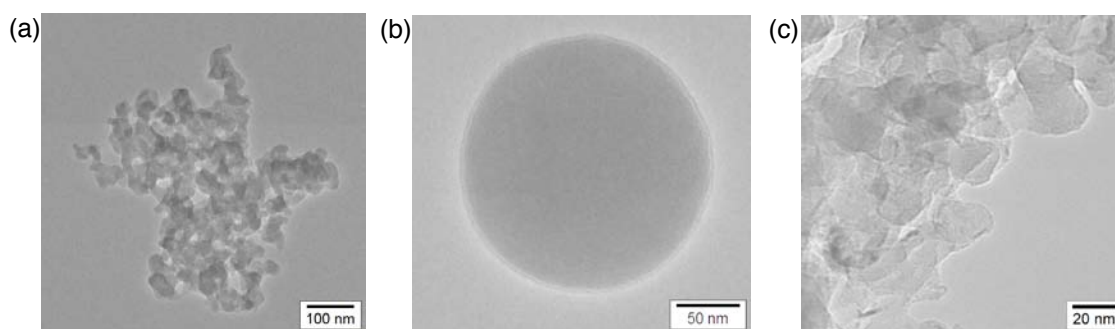

**Fig. S7** TEM images of 3 wt% Ni-Cu/SiO<sub>2</sub> with different morphologies and surface areas. (a) unshaped (low surface area), (b) spherical and (c) unshaped (high surface area).

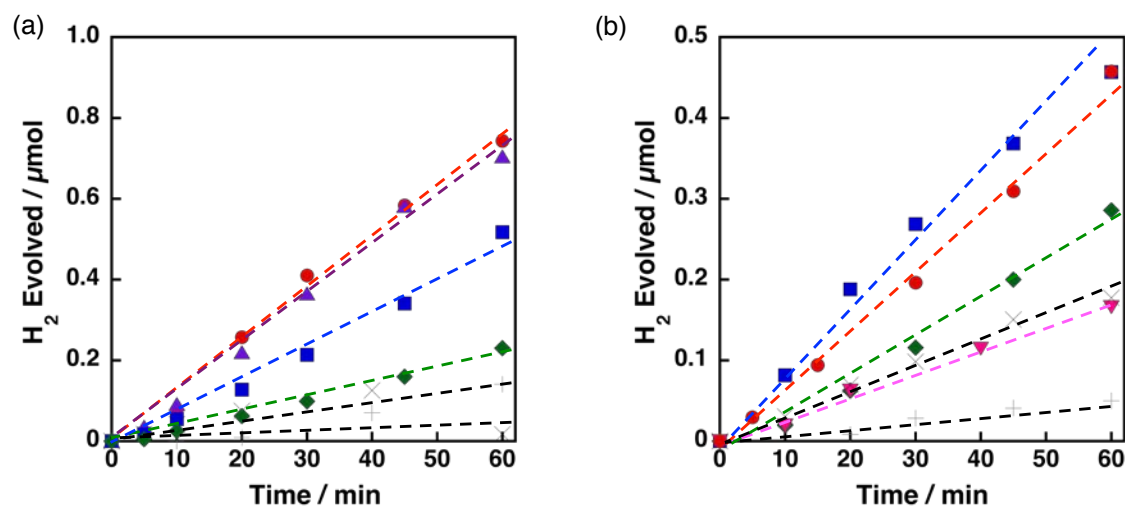

**Fig. S8** Time course of H<sub>2</sub> evolution by photoirradiation ( $\lambda > 340$  nm) of a mixed suspension (2.0 mL) of a phthalate buffer (pH 4.5) and MeCN [1:1 (v/v)] containing QuPh<sup>+</sup>-NA ( $8.8 \times 10^{-4}$  M), NADH ( $1.0 \times 10^{-3}$  M) and 3 wt% Ni-Cu/SiO<sub>2</sub> ( $100 \text{ mg L}^{-1}$ ) with various Ni/(Ni+Cu) ratio prepared by a co-impregnation method. [(a) SiO<sub>2</sub> (spherical) and (b) SiO<sub>2</sub> (unshaped, HS) with Ni/(Ni+Cu) = 0% (plus), 25% (green diamond), 33% (blue square), 50% (red circle), 67% (purple triangle), 75% (pink inverse triangle) and 100% (cross)].

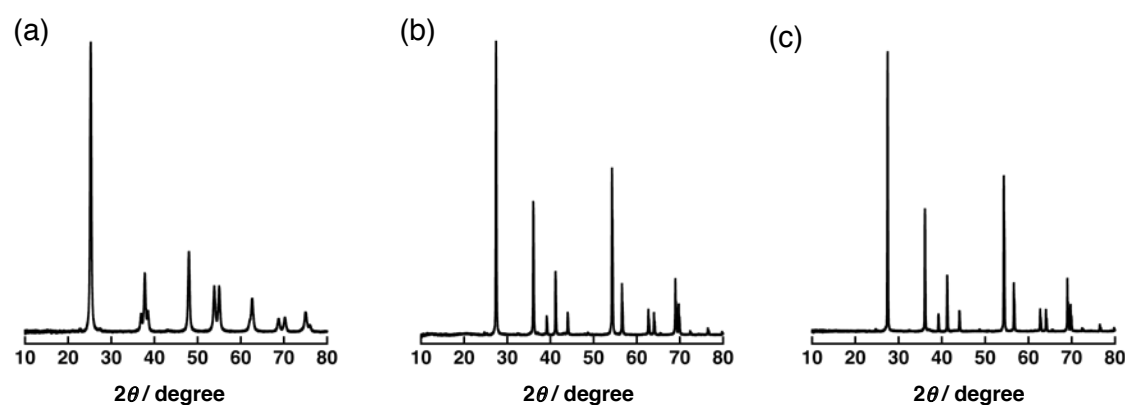

**Figure S9.** Powder X-ray diffraction patterns of TiO<sub>2</sub> (a) anatase with high surface area, (b) rutile high surface area and (c) rutile low surface area.
